# Supplementary figures and images for: Model Predictive Current Control of an Induction Motor Considering Iron Core Losses and Saturation
Source: MDPI journal article supplement (doi:10.3390/pr11102917), 2023-10-05

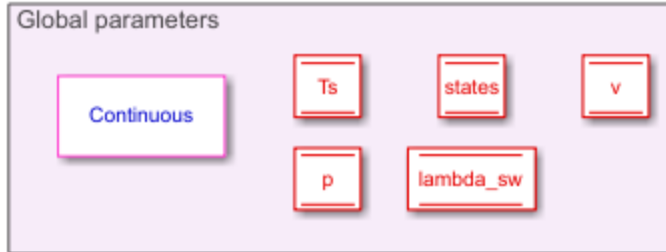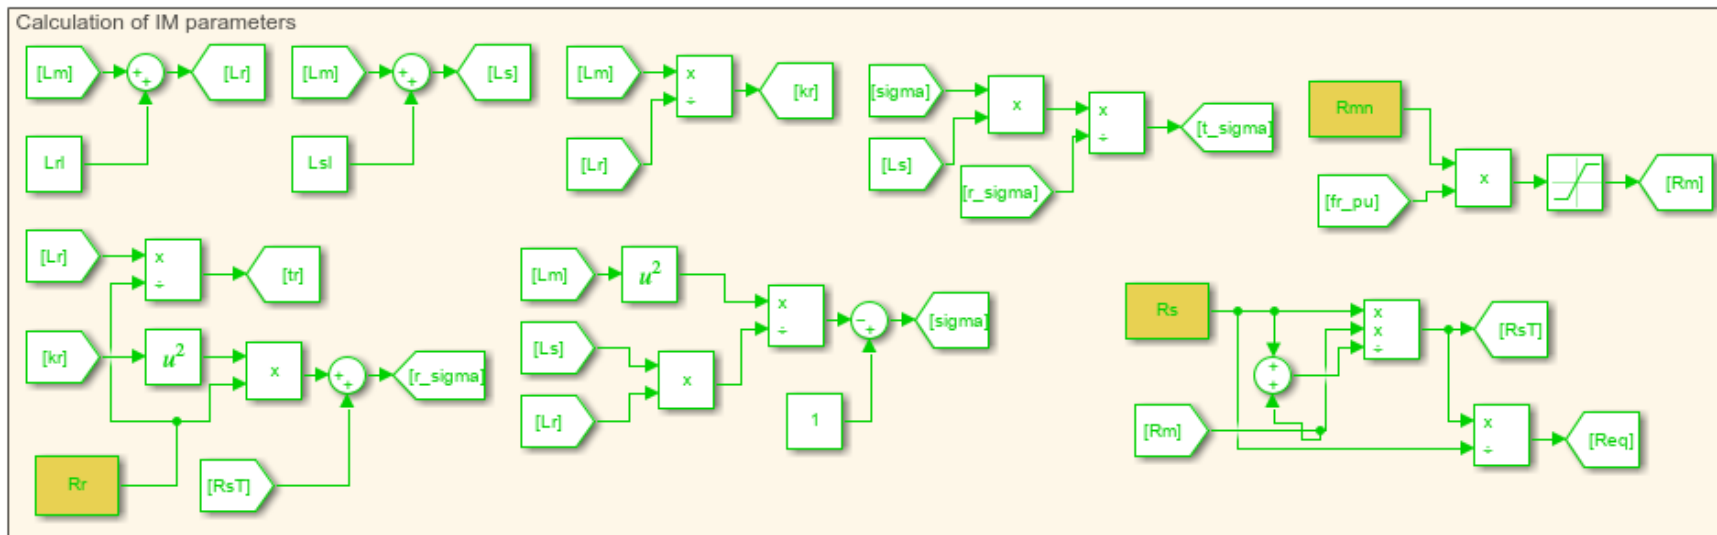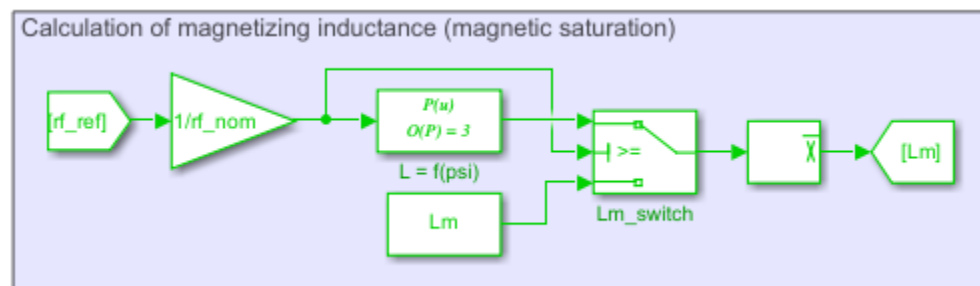

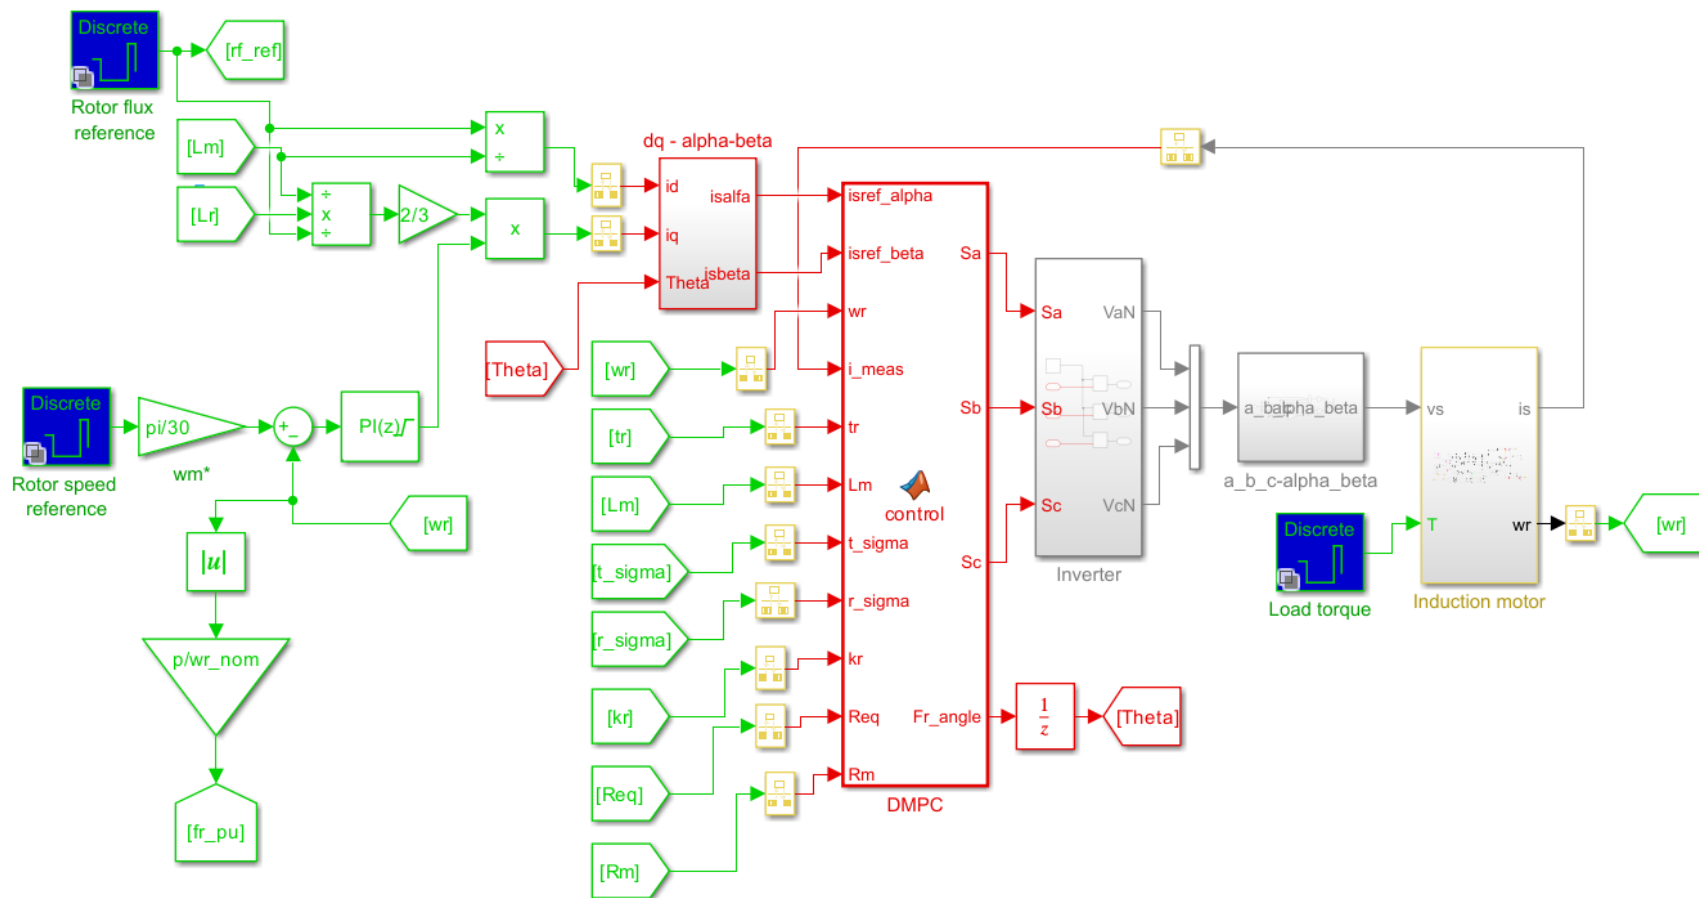

Supplement: s1 [file s1]
